# Supplementary material
Source: HighWire-hosted journal article supplement (https://hw-f5-jim.highwire.org/content/70/7/1520)
Supplement: inline-supplementary-material-1 [file inline-supplementary-material-1.pdf]

**Supplementary Table 1.** Correlations of natriuretic peptides with cardiovascular parameters

| Variable                                                                        | Entire cohort<br>N=21<br>Spearman r | Non-CKD<br>N=8<br>Spearman r | CKD<br>N=13<br>Spearman r |
|---------------------------------------------------------------------------------|-------------------------------------|------------------------------|---------------------------|
| <b>BNP</b>                                                                      |                                     |                              |                           |
| ECW/weight, L/kg                                                                | 0.18                                | -0.21                        | 0.13                      |
| Systolic blood pressure, mmHg                                                   | 0.25                                | 0.32                         | 0.01                      |
| Diastolic blood pressure, mmHg                                                  | -0.25                               | -0.29                        | -0.38                     |
| Pulse pressure, mmHg                                                            | 0.59**                              | 0.57                         | 0.29                      |
| Cardiac index, L/min/m <sup>2</sup>                                             | -0.76**                             | -0.50                        | -0.60*                    |
| Total peripheral resistance index,<br>dyn x sec/cm <sup>5</sup> /m <sup>2</sup> | 0.48*                               | 0.10                         | 0.17                      |
| <b>NT-pro-BNP</b>                                                               |                                     |                              |                           |
| ECW/weight, L/kg                                                                | 0.22                                | -0.29                        | 0.18                      |
| Systolic blood pressure, mmHg                                                   | 0.38                                | 0.45                         | 0.16                      |
| Diastolic blood pressure, mmHg                                                  | -0.09                               | -0.10                        | -0.22                     |
| Pulse pressure, mmHg                                                            | 0.58**                              | 0.76*                        | 0.26                      |
| Cardiac index, L/min/m <sup>2</sup>                                             | -0.62**                             | -0.49                        | -0.46                     |
| Total peripheral resistance index,<br>dyn x sec/cm <sup>5</sup> /m <sup>2</sup> | 0.38                                | 0.60                         | -0.009                    |

Abbreviations: CKD, chronic kidney disease; ECW, extracellular water

Natriuretic peptides, blood pressure values, and ECW/weight were measured the same day as the available cardiac index and total peripheral resistance index measurement for each participant.

\* $P < 0.05$

\*\* $P < 0.01$
